# Supplementary material for: Interleukin-33 produced by M2 macrophages and other immune cells contributes to Th2 immune reaction of IgG4-related disease
Source: PubMed Central journal article supplement (PMC5304322; doi:10.1038/srep42413), 2017-02-13
Supplement: srep42413-s1.pdf [file srep42413-s1.pdf]

# **Interleukin-33 produced by M2 macrophages and other immune cells contributes to immune reaction of IgG4-related disease**

Sachiko Furukawa, DDS, PhD<sup>1</sup>, Masafumi Moriyama, DDS, PhD<sup>1,2</sup>, Kensuke Miyake, MD, PhD<sup>3</sup>, Hitoshi Nakashima, MD, PhD<sup>4</sup>, Akihiko Tanaka, DDS, PhD<sup>1</sup>, Takashi Maehara, DDS, PhD<sup>1</sup>, Mana Iizuka-Koga, PhD<sup>5,6</sup>, Hiroto Tsuboi, MD, PhD<sup>5</sup>, Jun-Nosuke Hayashida, DDS, PhD<sup>1</sup>, Noriko Ishiguro, DDS<sup>1</sup>, Masaki Yamauchi, DDS<sup>1</sup>, Takayuki Sumida, MD, PhD<sup>5</sup>, and Seiji Nakamura, DDS, PhD<sup>1</sup>

<sup>1</sup> Section of Oral and Maxillofacial Oncology, Division of Maxillofacial Diagnostic and Surgical Sciences, Faculty of Dental Science, Kyushu University, Fukuoka, Japan

<sup>2</sup> OBT Research Center, Faculty of Dental Science, Kyushu University, Japan

<sup>3</sup> Division of Innate Immunity, Department of Microbiology and Immunology, Institute of Medical Science, University of Tokyo, Tokyo, Japan

<sup>4</sup> Division of Nephrology and Rheumatology, Department of Internal Medicine, Faculty of Medicine, Fukuoka University, Fukuoka, Japan

<sup>5</sup> Department of Internal Medicine, Faculty of Medicine, University of Tsukuba, Tsukuba, Japan

<sup>6</sup> Department of Microbiology and Immunology, Keio University School of Medicine, Tokyo, Japan

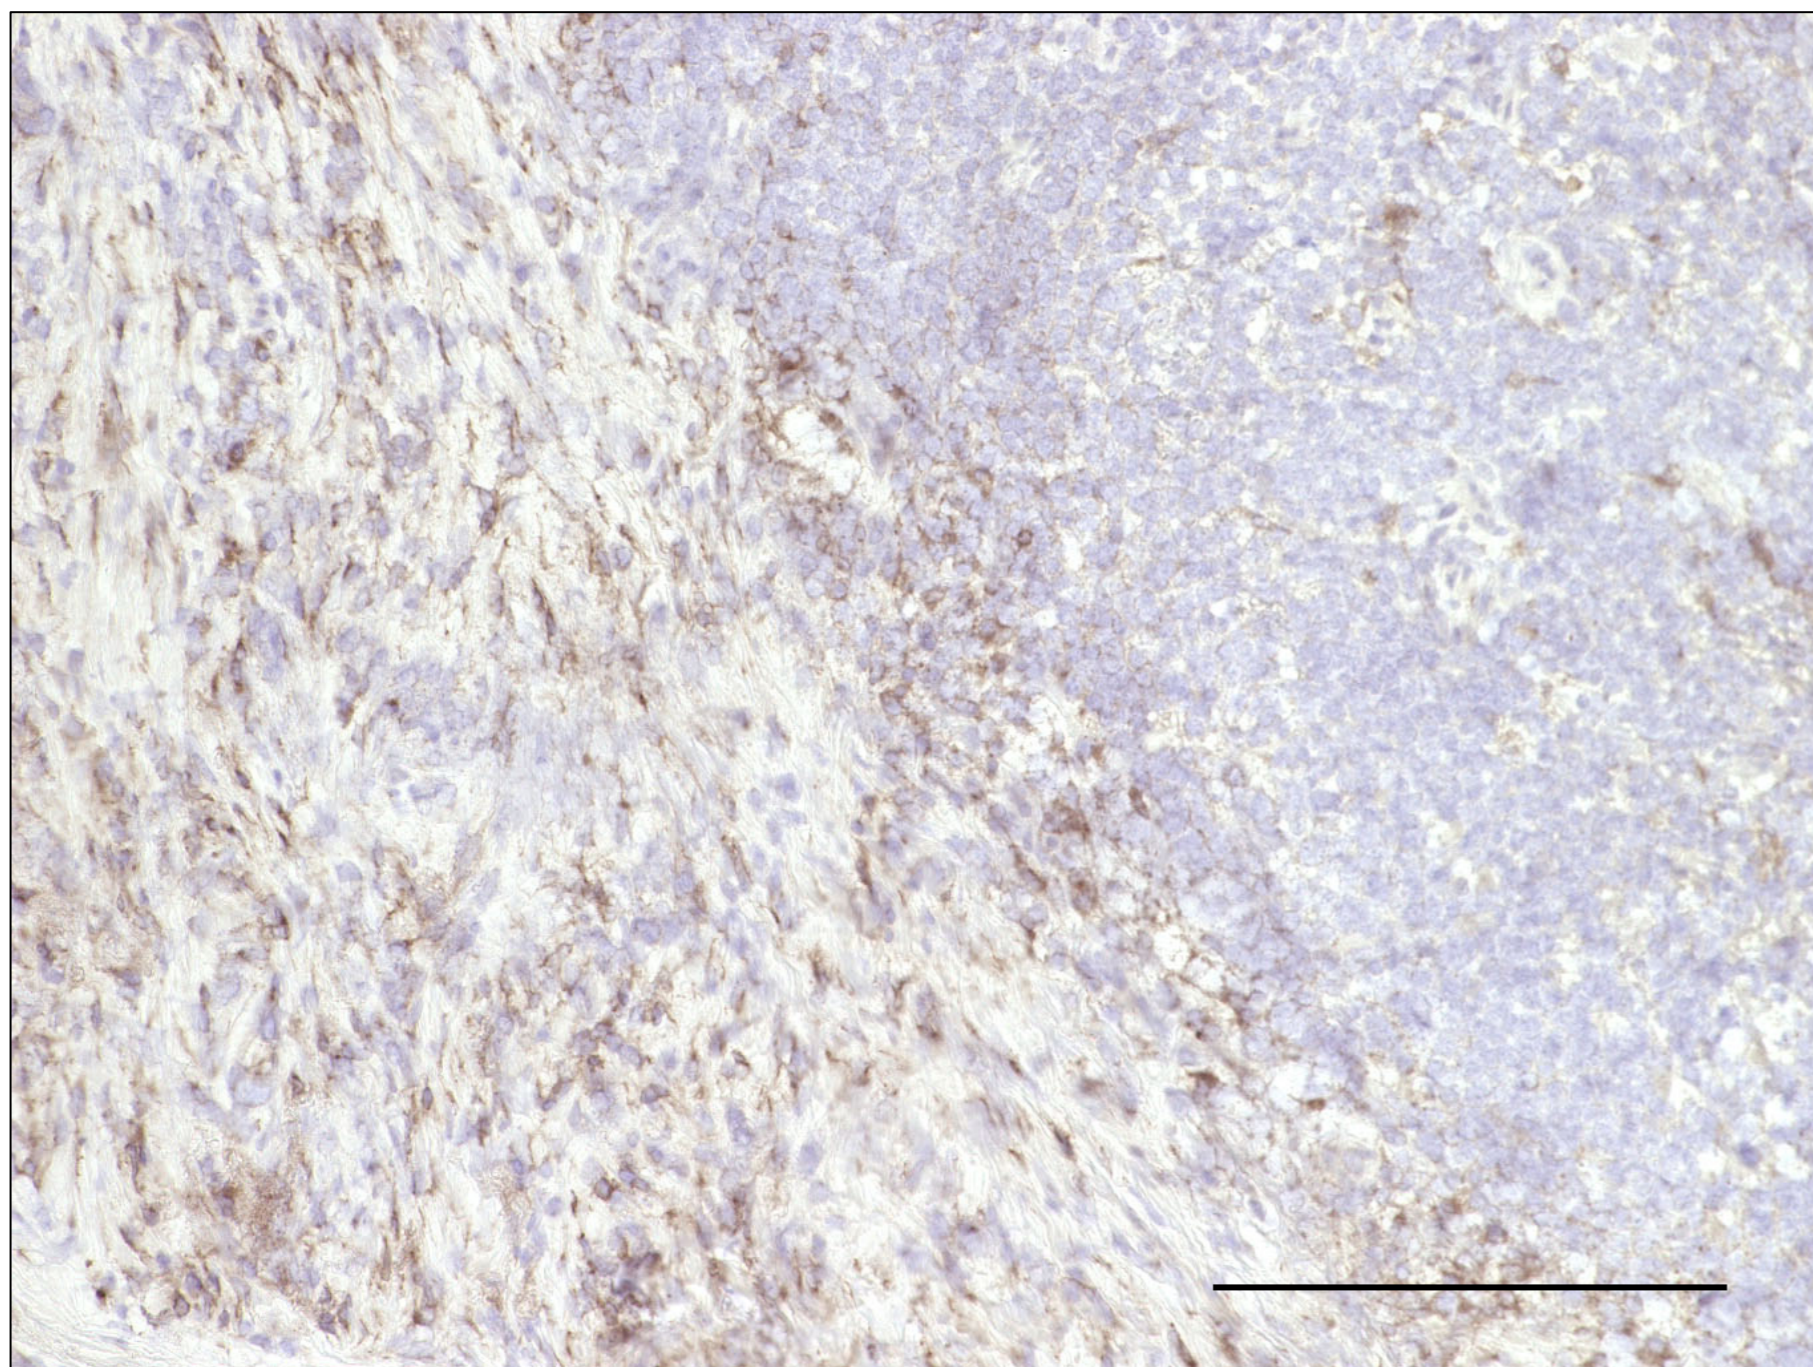

**TLR7**

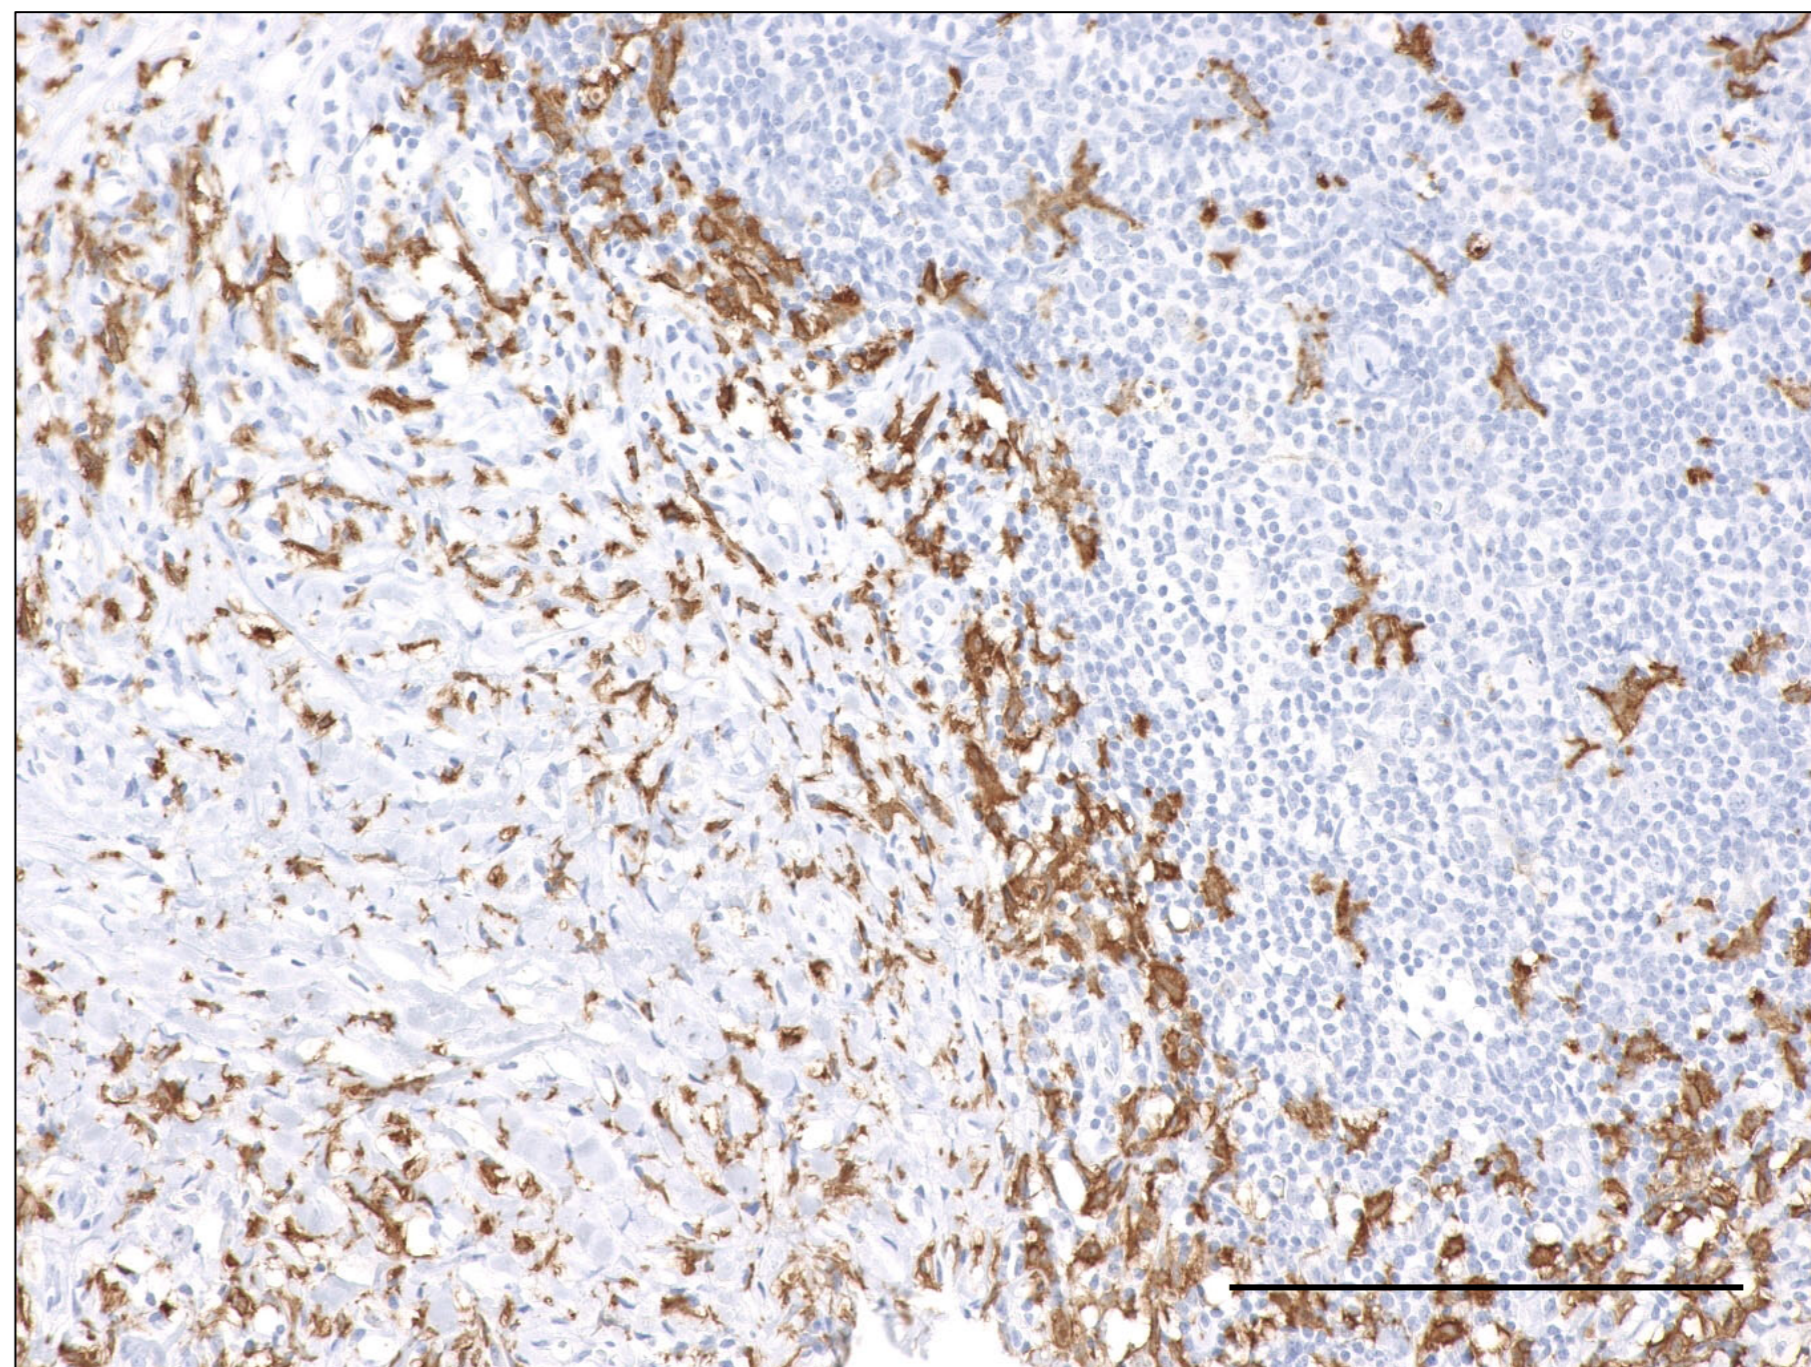

**CD163**

**Supplementary Figure 1.** Expression and localization of TLR7 and CD163 in SG from a representative patient with IgG4-RD. Counterstaining was performed with Mayer's hematoxylin (blue). Scale bars, 50  $\mu$ m.

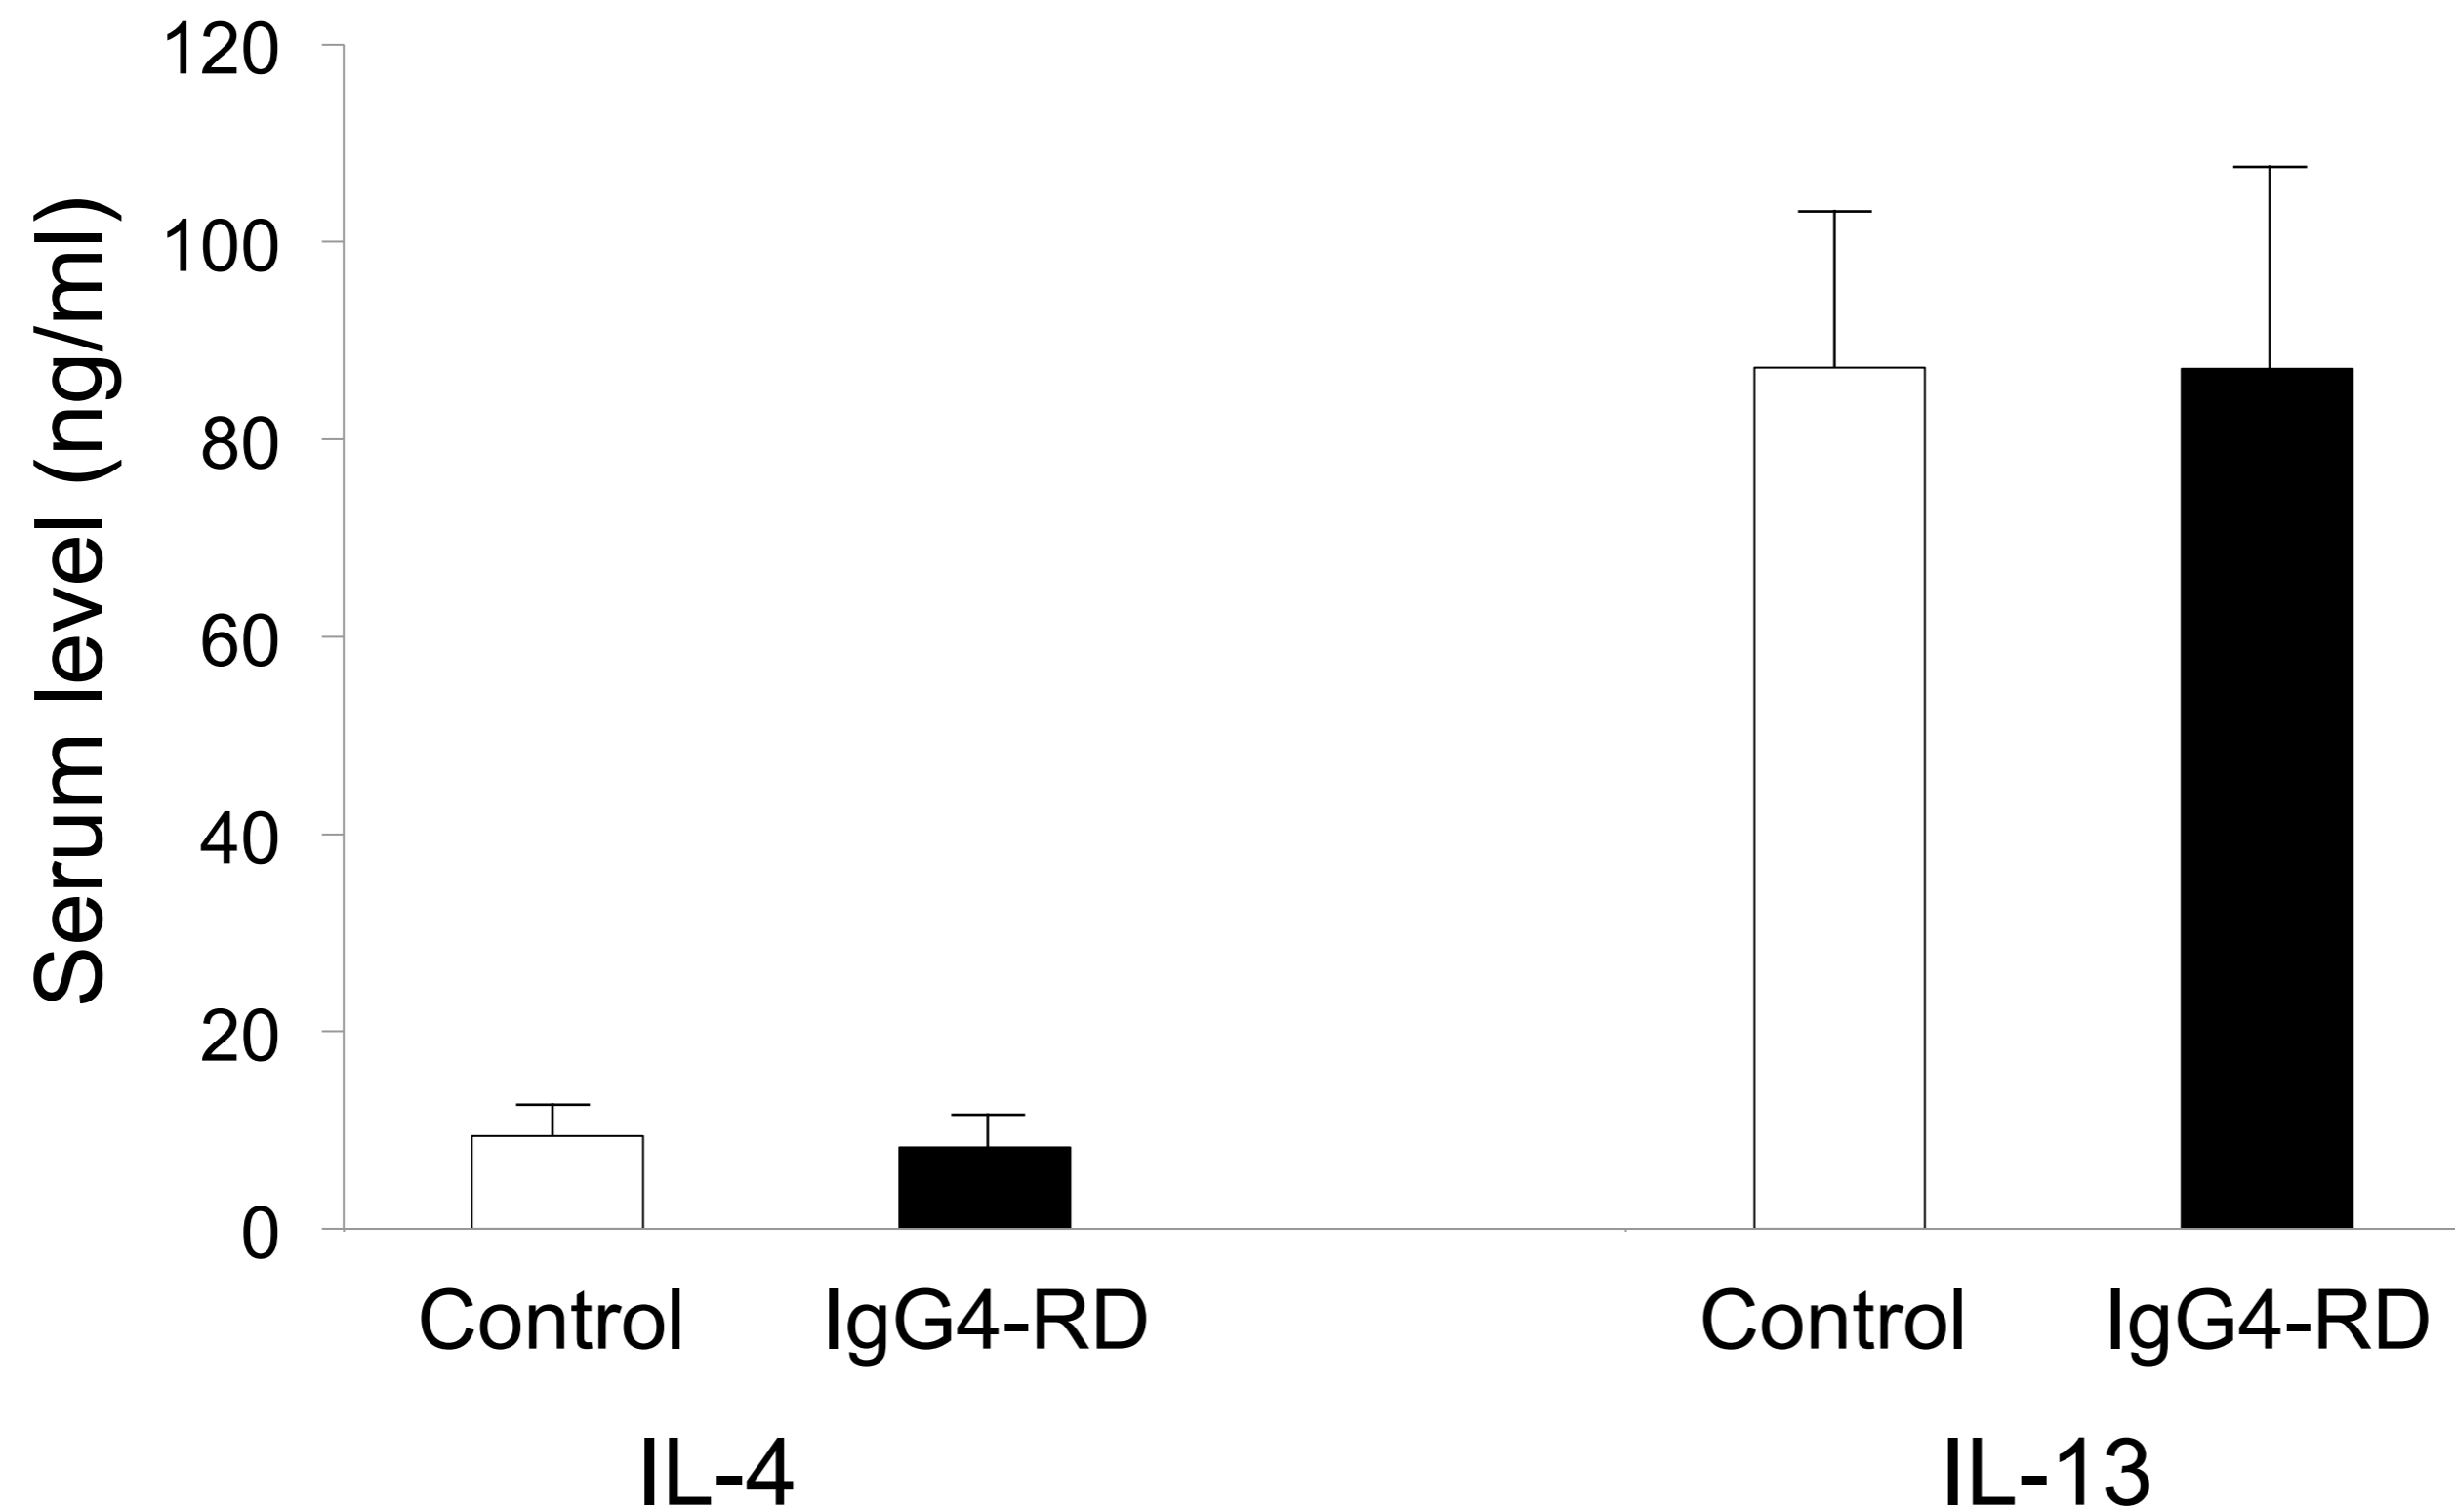

**Supplementary Figure 2.** Serum concentration of Th2 cytokines. Serum levels of IL-4 and IL-13 were measured in healthy controls (n = 12) and patients with IgG4-RD (n = 7). Significant differences between groups were determined by the Mann–Whitney *U* test.

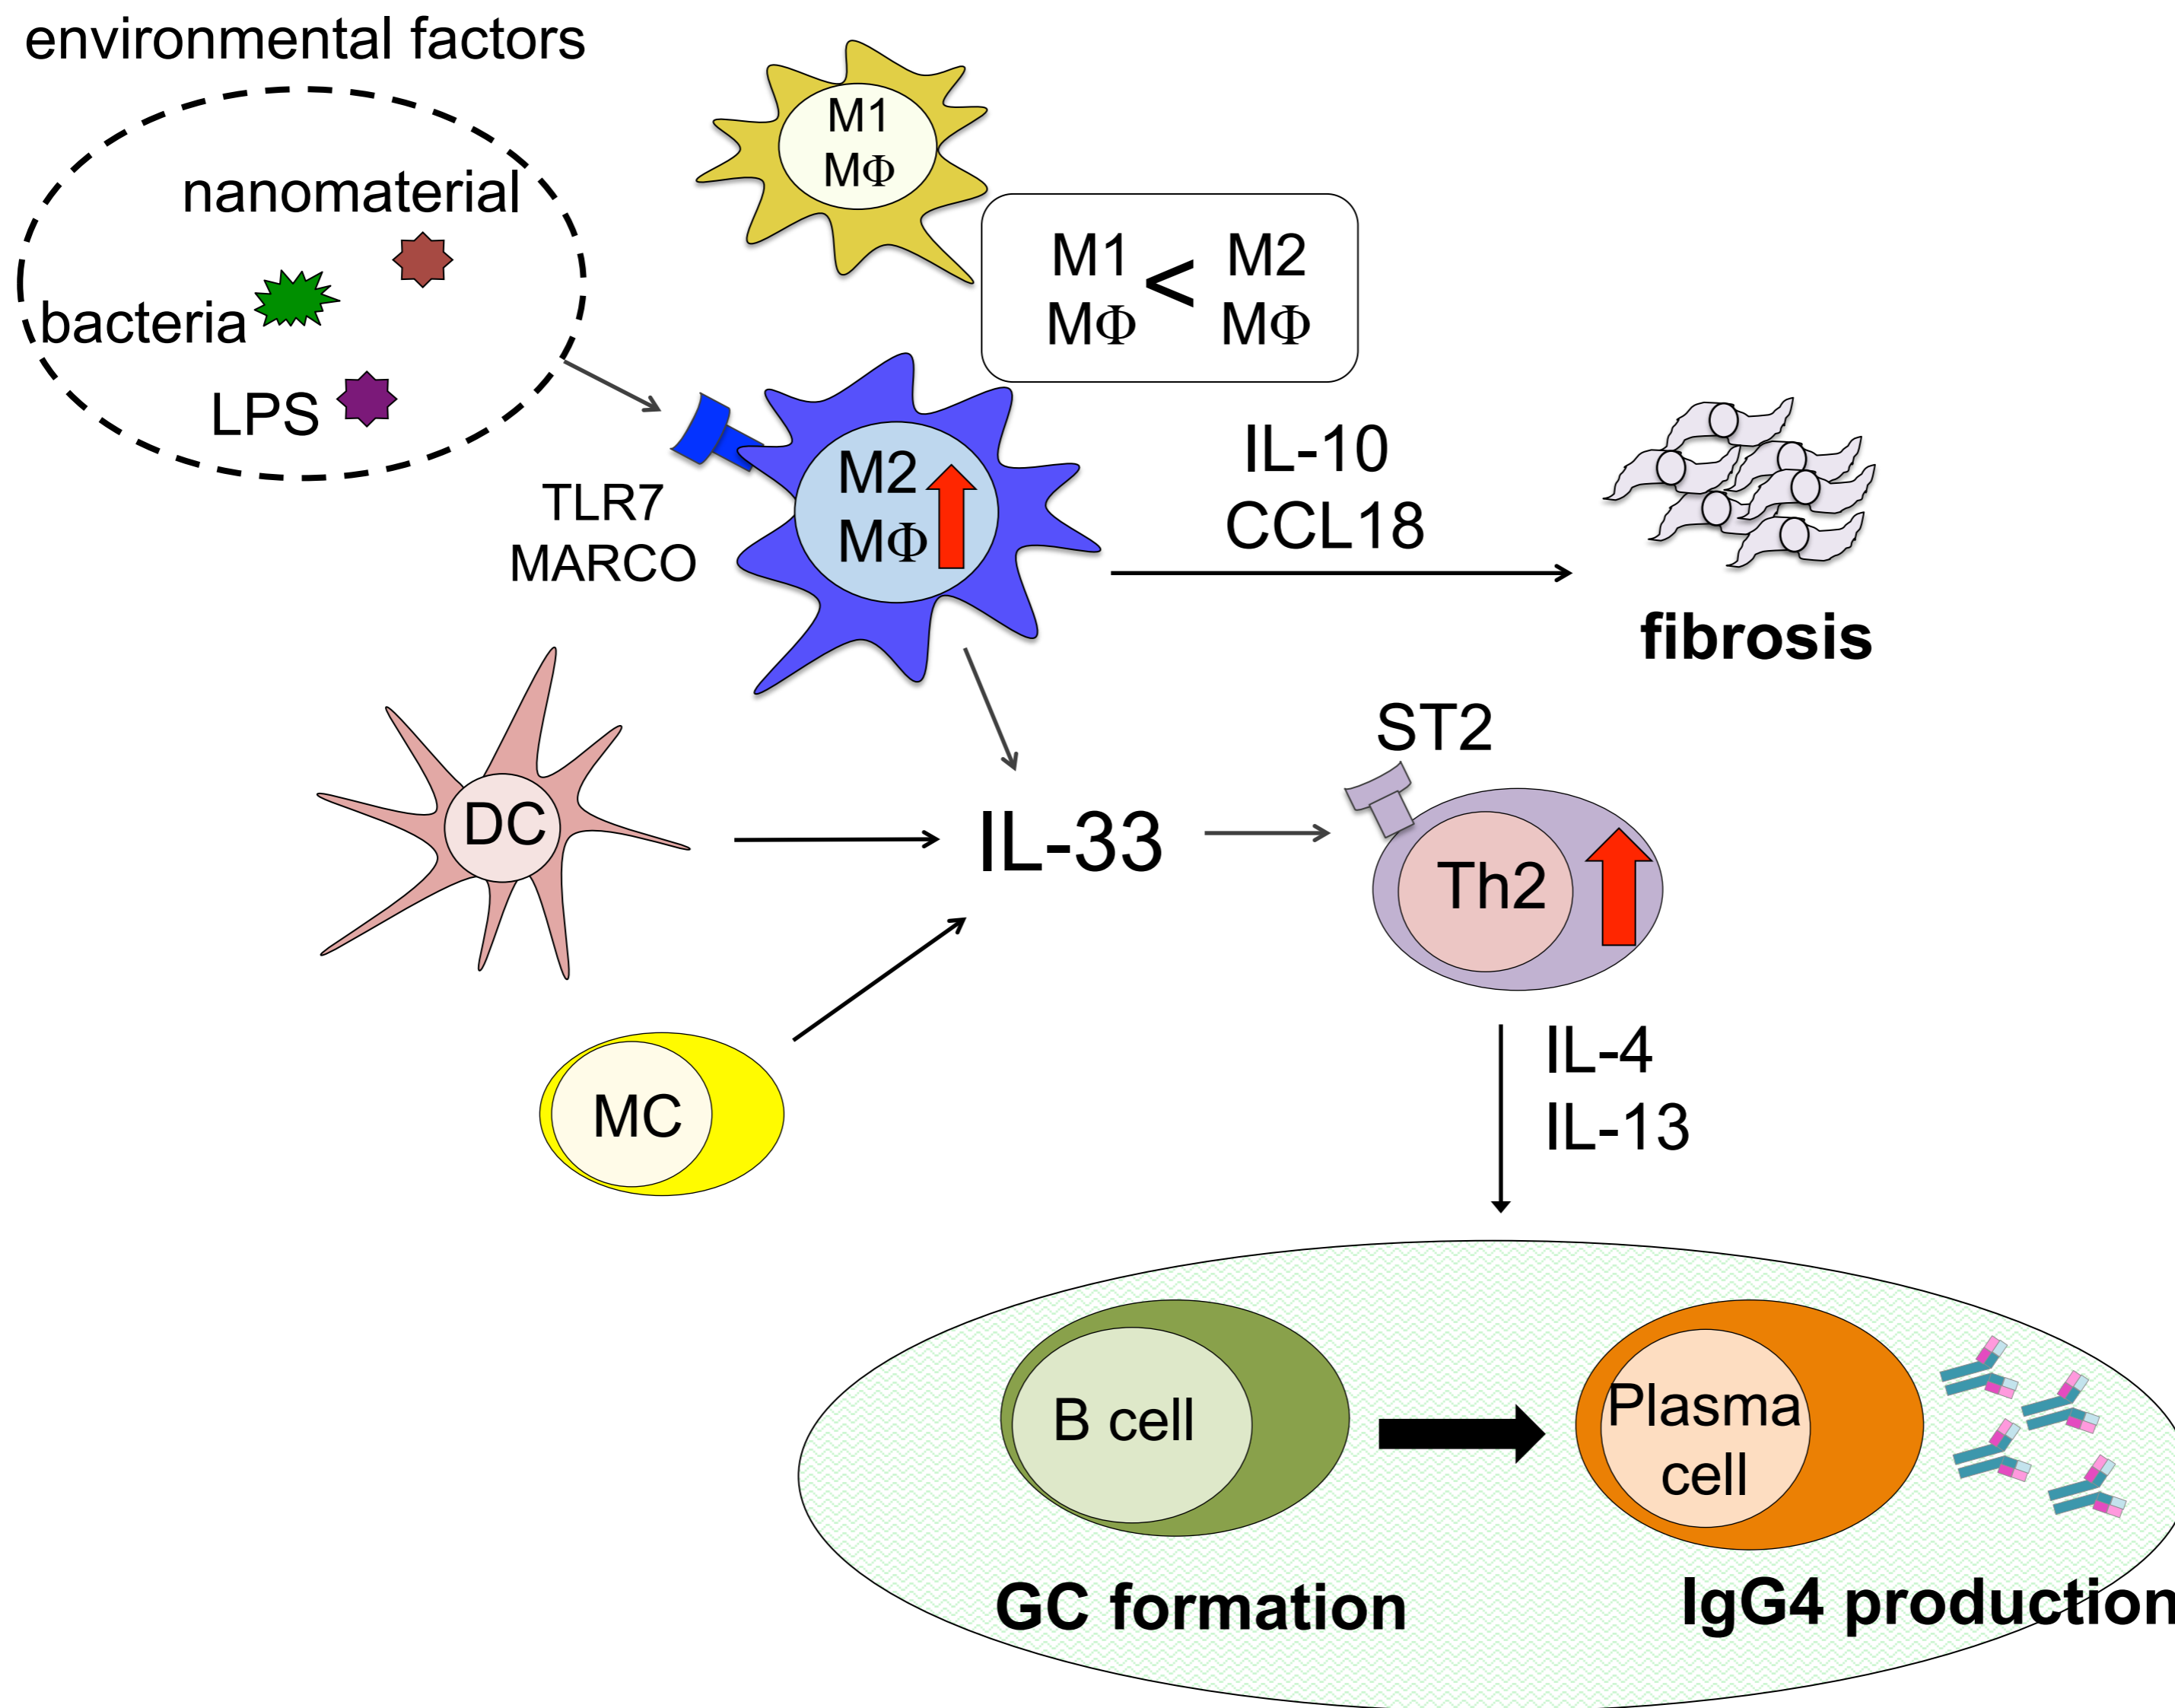

**Supplementary Figure 3.** Schematic model of IL-33 and innate immune network in IgG4-RD. M2 macrophages recognize some environmental factors and promote local fibrosis and production of T helper type 2 (Th2) cytokines via IL-33. Abbreviations: DC, dendritic cell; GC, germinal center; ; LPS, lipopolysaccharide; MARCO, macrophage receptor with collagenous structure; MC, mast cell; MΦ, macrophage; TLR, Toll-like receptor.
